# Supplementary material
Source: Research Square preprint supplement (doi:10.21203/rs.3.rs-7164936/v1)

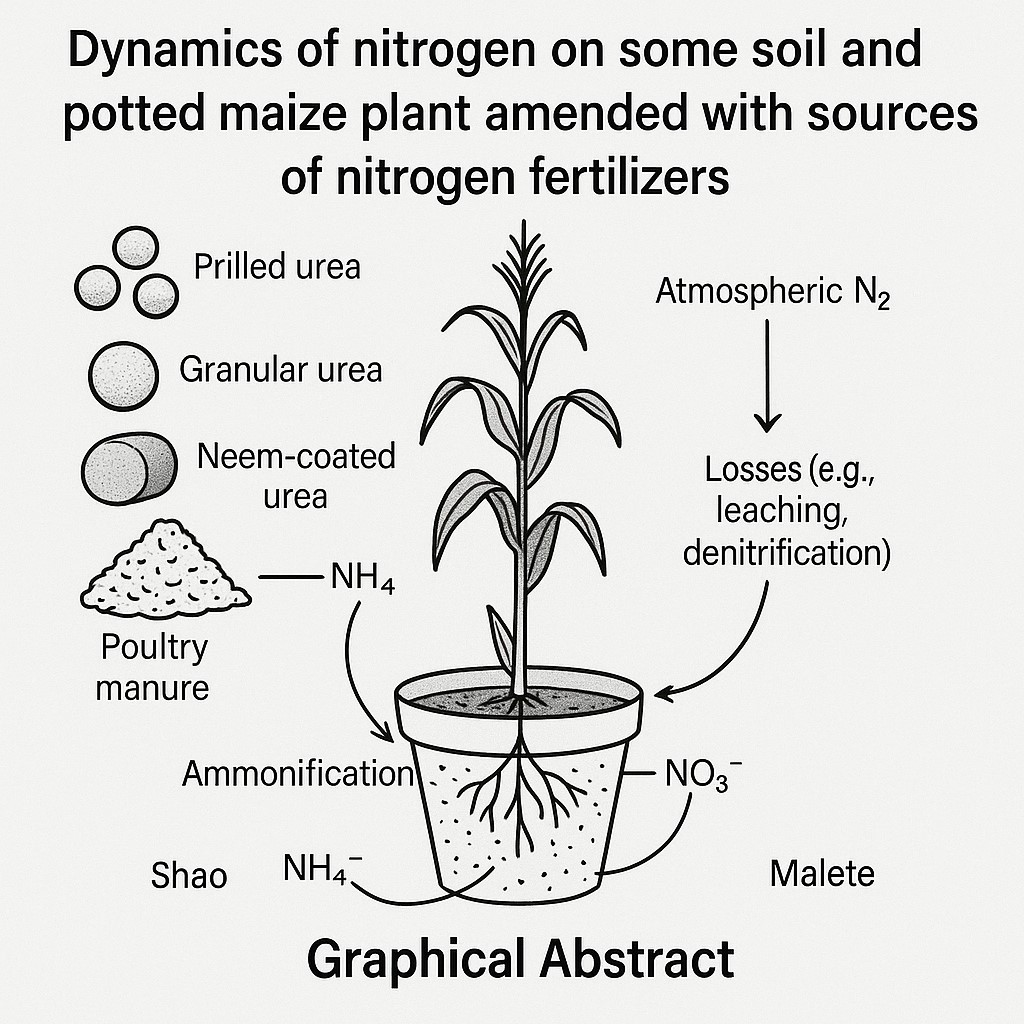

Supplement: Supplementary file 1 [file 7c369464916718f8a0b8f8e4.docx]
